# Supplementary material
Source: Elsevier journal article supplement (https://www.sciencedirect.com/science/article/pii/S2530380521000204)
Supplement: mmc1 [file S2530380521000204:mmc1.docx]

| **Supplementary File 1.** Description of the sociometric quantitative indices used in the present study. | |
| --- | --- |
| Indices | Description |
| **Peer sociometric nominations received indices** | |
| *Popularity Index* | Indicator referring to the degree of individual attractiveness, which consists of the number of liked nominations a child received divided by the number of classmates making nominations and multiplied by 100 (i.e., percentage of positive nominations received out of all possible) |
| *Antipathy index* | Indicator referring to the degree of individual repulsion or antipathy, which consists of the number of disliked nominations a child received divided by the number of classmates making nominations and multiplied by 100 (i.e., percentage of negative nominations received out of all possible) |
| *Social impact index* | Indicator referring to social activity, which consists of the number of total nominations(i.e., liked and disliked) a child received divided by the number of classmates making nominations and multiplied by 100 (i.e., percentage of peers who have a positive or negative relationship with the child) |
| *Social preference index* | Indicator referring to social preference, which consists of the difference between the number of liked nominations and disliked nominations a child received divided by the number of classmates making nominations and multiplied by 100 (i.e., percentage of the difference between positive and negative nominations received) |
| **Friendship and Enmity Indexes** | |
| *Friends index* | Indicator referring to mutual attractiveness or friends, which consists of the number of mutually liked nominations a child had in the classroom divided by the number of classmates making nominations and multiplied by 100 (i.e., percentage of friendship relations out of all possible) |
| *Enemies index* | Indicator referring to mutual antipathy or repulsion, which consists of the number of mutual disliked nominations a child had in the classroom divided by the number of classmates making nominations and multiplied by 100 (i.e., percentage of enmity relations out of all possible) |
