# Supplementary material
Source: Elsevier journal article supplement (https://www.sciencedirect.com/science/article/pii/S2530380521000204)
Supplement: mmc3 [file S2530380521000204:mmc3.docx]

**Supplementary File 3. Sensitivity analysis outcomes following a per-protocol approach**

**
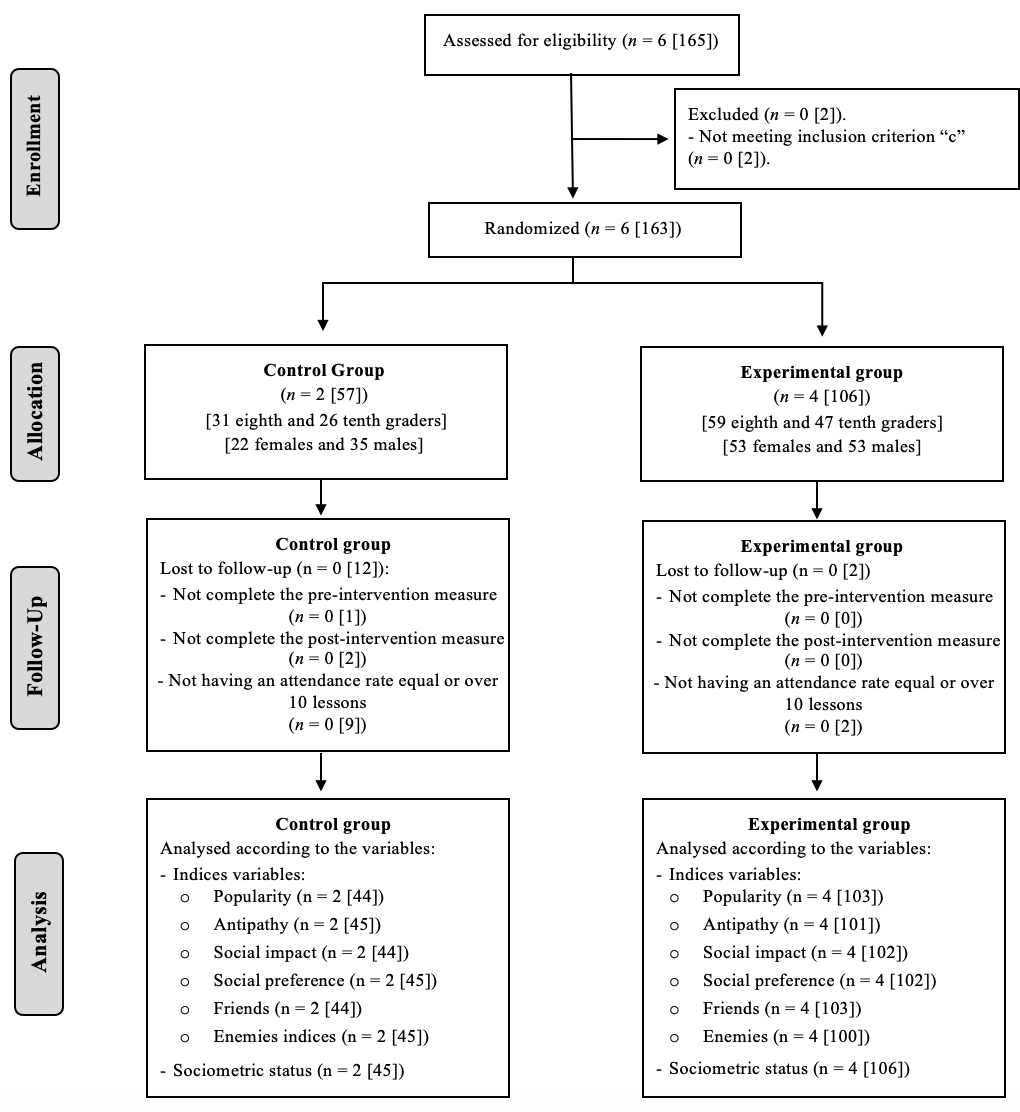
**

**Supplementary File 3.** Flow chart of the school classes and students of the present study following a per-protocol approach. All numbers are school classes [students]

| **Supplementary File 3.** Effect of the Sport Education-based teaching units on students’ sociometry scores following a per-protocol approach | | | | | | | | |
| --- | --- | --- | --- | --- | --- | --- | --- | --- |
|  |  | Pre-intervention | Post-intervention | Difference | Multilevel Lineal Model | | | Effect sizes |
| Indices | Group | Mean (SD) | Mean (SD) | Mean (SD) | *- 2LL* | *F* | *p* | *d* |
| **Peer sociometric nominations received indices** | | | | | | | | |
| Popularity | CG (*n* = 44) | 10.44 (5.19) | 10.79 (6.38) | .35 (5.24) | 860.169 | .495 | .483 | -.05 |
| EG (*n* = 103) | 11.42 (6.24) | 11.46 (6.65) | .04 (4.33) |  |  |  |  |
| Antipathy | CG (*n* = 45) | 10.58 (12.92) | 11.08 (13.12) | .50 (5.30) | 922.803 | .869 | .353 | -.07 |
| EG (*n* =101) | 11.68 (14.77) | 11.23 (14.84) | -.45 (5.93) |  |  |  |  |
| Social impact | CG (*n* = 45) | 21.23 (12.98) | 21.72 (13.77) | .49 (7.13) | 1010.194 | .050 | .823 | -.02 |
| EG (*n* = 102) | 22.93 (14.02) | 23.12 (16.02) | .19 (7.75) |  |  |  |  |
| Social preference | CG (*n* = 44) | -.38 (14.77) | -.18 (15.44) | .20 (7.00) | 989.123 | .003 | .954 | .00 |
| EG (*n* = 102) | .30 (17.10) | .42 (16.62) | .12 (7.30) |  |  |  |  |
| **Friendship and Enmity indices** | | | | | | | | |
| Friends | CG (*n* = 44) | 7.39 (3.37) | 6.80 (3.26) | -.59 (3.51) | 780.029 | .011 | .918 | -.03 |
| EG (*n* = 103) | 7.58 (3.94) | 6.88 (4.19) | -.70 (3.47) |  |  |  |  |
| Enemies | CG (*n* = 45) | 3.04 (3.16) | 2.39 (2.77) | -.65 (3.03) | 708.395 | .014 | .904 | .13 |
| EG (*n* = 100) | 2.44 (3.27) | 2.20 (3.56) | -.24 (2.92) |  |  |  |  |
| *Note*. SD = Standard deviation; - 2LL = -2 log-likelihood; *d* = Cohen’s *d* effect size; CG = Control Group; EG = Experimental Group. | | | | | | | | |

**Supplementary File 3.** Students’ sociometric status following a per-protocol approach
