# Supplementary material
Source: Elsevier journal article supplement (https://www.sciencedirect.com/science/article/pii/S2530380521000204)
Supplement: mmc4 [file S2530380521000204:mmc4.docx]

**
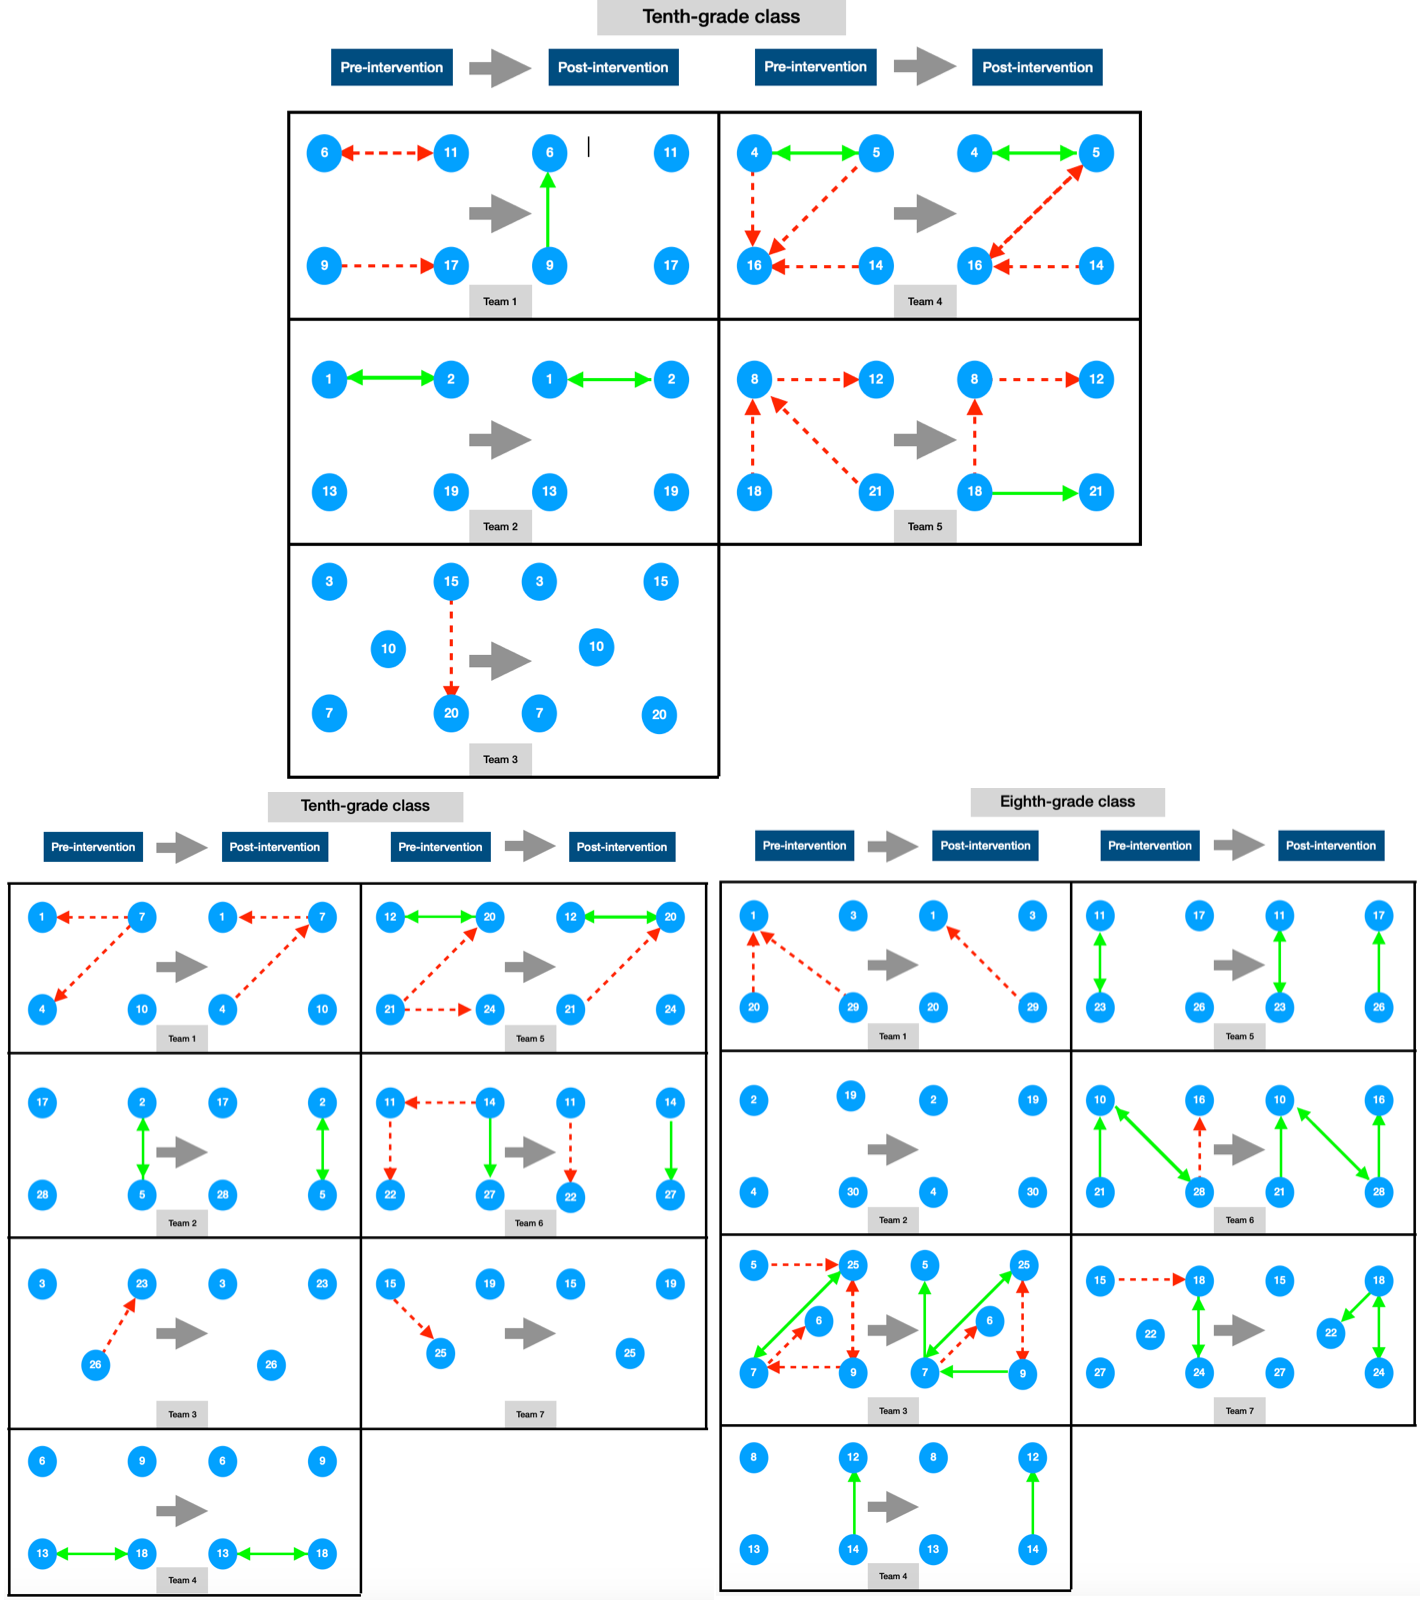
**

**Supplementary File 4.** The within-teams sociometric nominations in the other classes. Green and continuous line arrows are positive nominations and red and dashed line arrows are negative nominations. Single-pointed arrows indicate one-way relationships, while double-headed arrows indicate reciprocal relationships. Nominations emitted to students who were on another team have been removed for a better understanding of the figure.
